# Supplementary material for: Strategic immobilization of α-amylase on a ZIF-8 nanoplatform for targeted bioactivity screening of Gynura medica extracts
Source: Royal Society of Chemistry journal article supplement (doi:10.1039/d5ay01615k), 2026-01-01
Supplement: d5ay01615k1.pdf [file d5ay01615k1.pdf]

## Supplementary material

### Strategic Immobilization of $\alpha$ -Amylase on ZIF-8 Nanoplatfrom for Targeted Bioactivity Screening in *Gynura medica* Extracts

Ke Ma\*, Yuying An, Yu-qing Zhang, Gui-fang Zhong

School of Food and Biological Engineering, Key Laboratory of Industrial

Biotechnology in the Tobacco Industry, Zhengzhou University of Light Industry, 136

Kexuedadao Road, 450008, Zhengzhou, China

## Content

Figure 1S: Scanning electron microscopy images of ZIF-8 @  $\alpha$ -amylase immobilized materials synthesized with different concentrations of 2-methylimidazole

Figure 2S: FTIR spectra of ZIF-8@  $\alpha$ -amylase immobilized materials synthesized by  $\alpha$ -amylase at different 2-methylimidazole concentration

Figure 3S: Scanning electron microscopy of ZIF-8@  $\alpha$ -amylase immobilized materials synthesized with different concentrations of zinc nitrate

Figure 4S: FTIR spectra of ZIF-8@  $\alpha$ -amylase immobilized materials synthesized by  $\alpha$ -amylase at different concentrations

Figure 5S: Variation trend of enzyme loading rate and amount with  $\alpha$ -amylase concentration in ZIF-8@  $\alpha$ -amylase immobilized material

Figure 6S: Enzymatic properties of ZIF-8@  $\alpha$ -amylase (a: The effect of temperature

on enzyme activity; B: The effect of pH on enzyme activity; C: Comparison of reaction kinetics curves before and after immobilization)

Figure 7S: Liquid chromatography-mass spectrometry analysis of mixed sample total ion chromatogram

Table 1S: Effects of 2-methylimidazole concentration changes on enzyme activity

Table 2S: Effect of zinc nitrate concentration on the activity of immobilized enzyme

Table 3S: The comprehensive chemical analysis of affinity extraction eluates

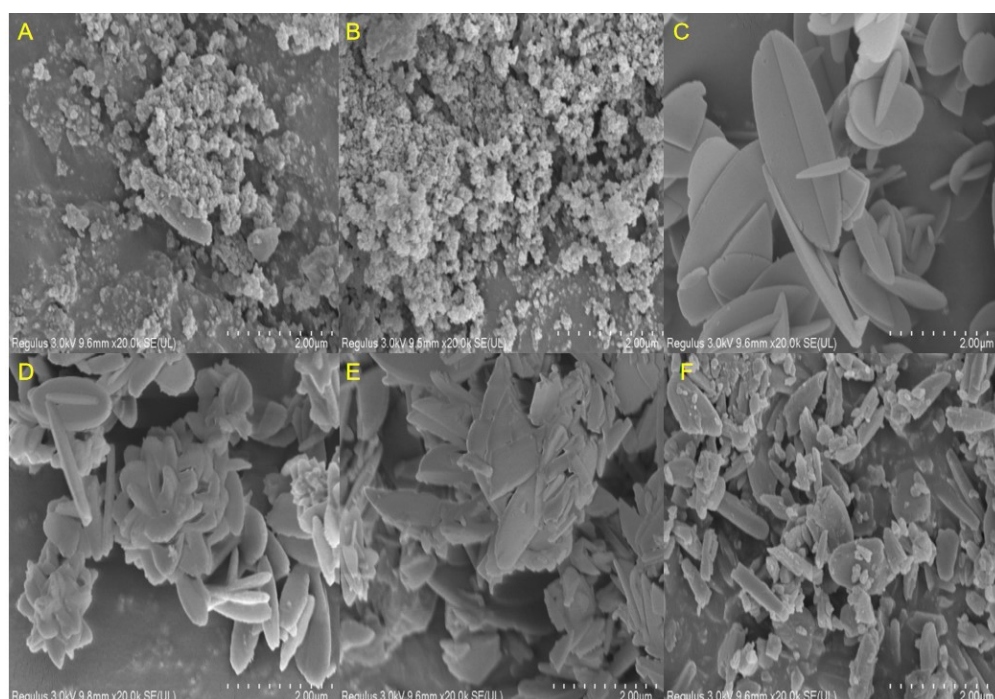

Figure 1S Scanning electron microscopy images of ZIF-8 @  $\alpha$ -amylase immobilized materials synthesized with different concentrations of 2-methylimidazole (A: 0.1 M, B: 0.2 M, C: 0.4 M, D: 0.6 M, E: 0.8 M, F:1.0 M)

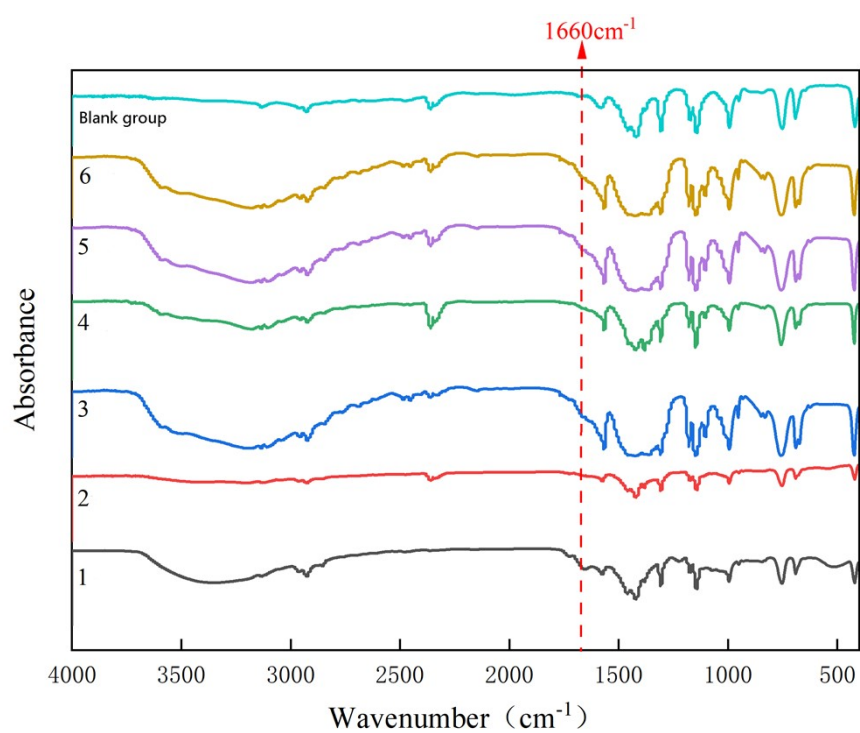

Figure 2S FTIR spectra of ZIF-8@  $\alpha$ -amylase immobilized materials synthesized by  $\alpha$ -amylase at different 2-methylimidazole concentration (1: 0.1 M, 2: 0.2 M, 3: 0.4 M, 4: 0.6 M, 5: 0.8 M, 6:1.0 M)

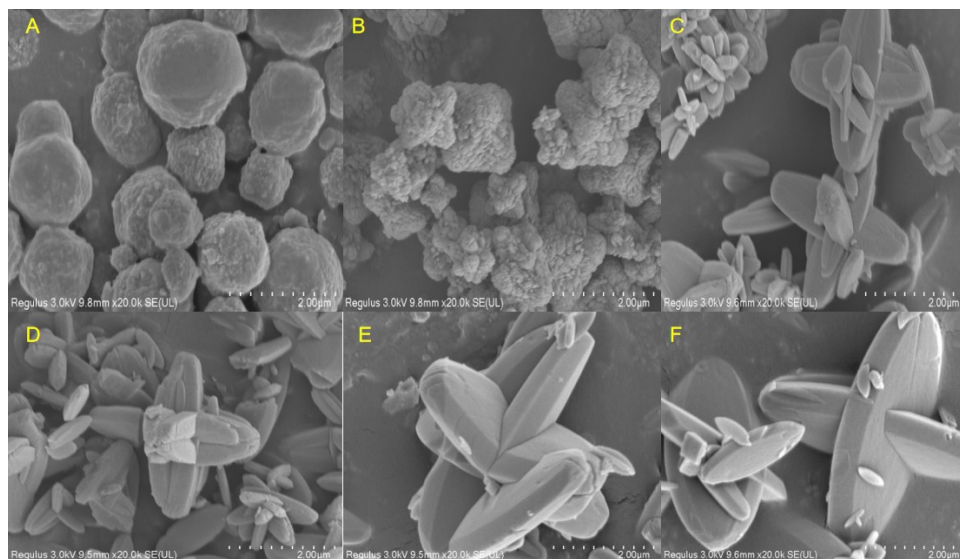

Figure 3S Scanning electron microscopy of ZIF-8@  $\alpha$ -amylase immobilized materials synthesized with different zinc nitrate concentrations ( A: 0.1 M, B: 0.2 M, C: 0.3 M, D: 0.4 M, E: 0.5 M, F: 0.6 M)

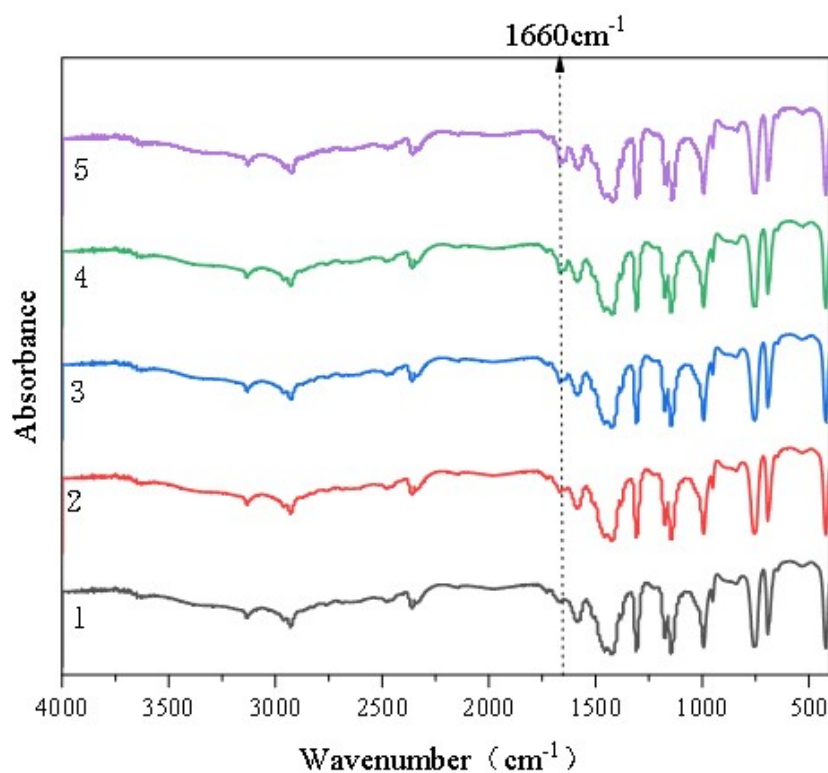

Figure 4S FTIR spectra of ZIF-8@  $\alpha$ -amylase immobilized materials synthesized by  $\alpha$ -amylase at different concentrations (1: 5 mg/mL, 2: 10 mg/mL, 3: 20 mg/mL, 3: 30 mg/mL, 4: 40 mg/mL, 5: 50 mg/mL)

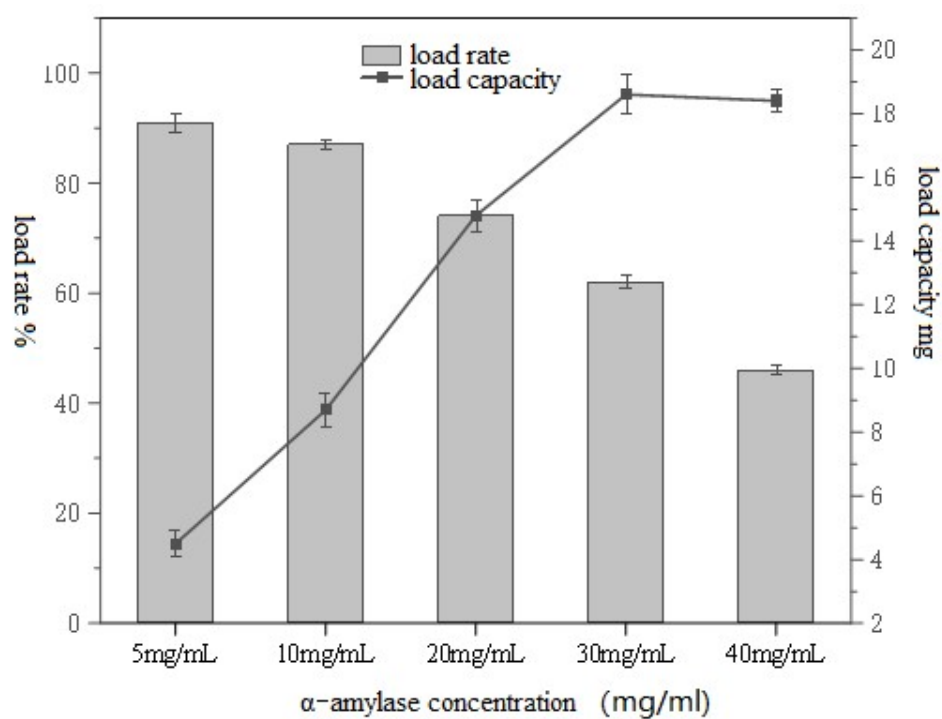

Figure 5S Variation trend of enzyme loading rate and amount with  $\alpha$ -amylase concentration in ZIF-8@  $\alpha$ -amylase immobilized material

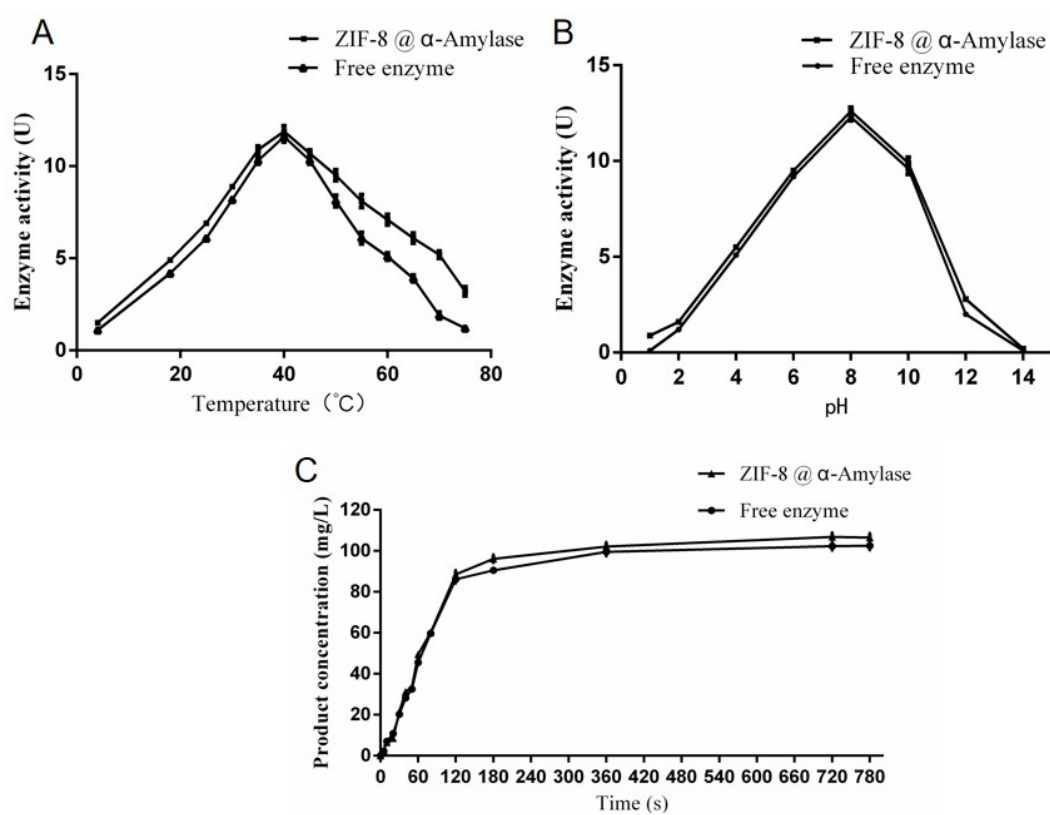

Figure 6S Enzymatic properties of ZIF-8@α-amylase (A: The effect of temperature on enzyme activity; B: The effect of pH on enzyme activity; C: Comparison of reaction kinetics curves before and after immobilization)

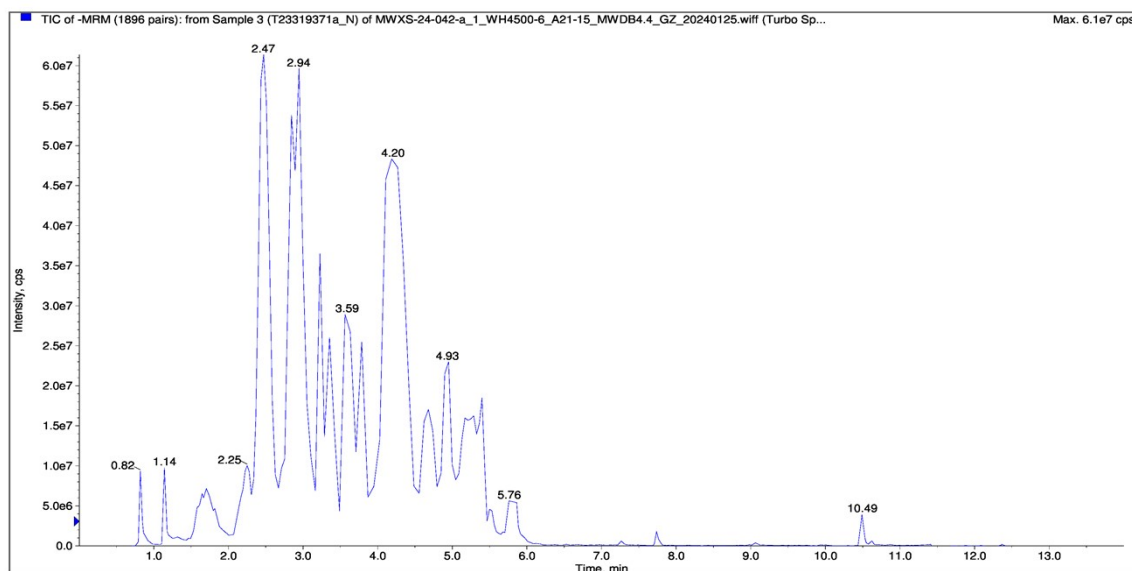

Figure 7S: Liquid chromatography-mass spectrometry analysis of mixed sample total ion chromatogram



Table 1S: Effects of 2-methylimidazole concentration changes on enzyme activity

| No. | 2-methylimidazole<br>concentration/M | Immobilized enzyme<br>activity/U |
|-----|--------------------------------------|----------------------------------|
| 1   | 0.1                                  | 0.029                            |
| 2   | 0.2                                  | 0.056                            |
| 3   | 0.4                                  | 0.078                            |
| 4   | 0.6                                  | 0.128                            |
| 5   | 0.8                                  | 0.204                            |
| 6   | 1.0                                  | 0.015                            |

Table 2S Effect of zinc nitrate concentration on the activity of immobilized enzyme

| No. | Zinc nitrate<br>concentration/M | Immobilized<br>enzyme activity/U |
|-----|---------------------------------|----------------------------------|
| 1   | 0.3                             | 0.128                            |
| 2   | 0.4                             | 0.144                            |
| 3   | 0.5                             | 0.204                            |
| 4   | 0.6                             | 0.218                            |
| 5   | 0.7                             | 0.224                            |
| 6   | 0.8                             | 0.231                            |

Table 3S The comprehensive chemical analysis of affinity extraction eluates

| PeakID | Title                                       | Adduct             | Formula       | Superclass                          | Class                                          |
|--------|---------------------------------------------|--------------------|---------------|-------------------------------------|------------------------------------------------|
| 582    | dioctylamine                                | [M+H] <sup>+</sup> | C16H35<br>N   | Organic nitrogen<br>compounds       | Organonitrogen<br>compounds                    |
| 209    | Alpha-cyclodextrin                          | [M+H] <sup>+</sup> | C36H60<br>O30 | Organic oxygen<br>compounds         | Organooxygen<br>compounds                      |
| 237    | Amarogentin                                 | [M+H] <sup>+</sup> | C29H30<br>O13 | Benzenoids                          | Benzene and<br>substituted<br>derivatives      |
| 449    | N-Methylnuciferine                          | [M+H] <sup>+</sup> | C20H24<br>NO2 | Alkaloids and<br>derivatives        | Aporphines                                     |
| 87     | 3-Methylpyrazole                            | [M+H] <sup>+</sup> | C4H6N2        | Organoheterocyclic<br>compounds     | Azoles                                         |
| 587    | Tetradecyldiethanolamin<br>e                | [M+H] <sup>+</sup> | C18H39<br>NO2 | Organic nitrogen<br>compounds       | Organonitrogen<br>compounds                    |
| 815    | Diphenylphosphate                           | [M+H] <sup>+</sup> | C12H11<br>O4P | Organic acids and<br>derivatives    | Organic phosphoric<br>acids and<br>derivatives |
| 617    | N-Methyldioctylamine                        | [M+H] <sup>+</sup> | C17H37<br>N   | Organic nitrogen<br>compounds       | Organonitrogen<br>compounds                    |
| 201    | Phenylacetaldehyde                          | [M+H] <sup>+</sup> | C8H8O         | Benzenoids                          | Benzene and<br>substituted<br>derivatives      |
| 564    | Dicyclohexylurea                            | [M+H] <sup>+</sup> | C13H24<br>N2O | Organic acids and<br>derivatives    | Organic carbonic<br>acids and<br>derivatives   |
| 910    | Phthalic anhydride                          | [M+H] <sup>+</sup> | C8H4O3        | Organoheterocyclic<br>compounds     | Benzofurans                                    |
| 507    | Coptisine                                   | [M+H] <sup>+</sup> | C19H14<br>NO4 | Alkaloids and<br>derivatives        | Protoberberine<br>alkaloids and<br>derivatives |
| 857    | Stearamide                                  | [M+H] <sup>+</sup> | C18H37<br>NO  | Organic acids and<br>derivatives    | Carboximidic acids<br>and derivatives          |
| 589    | N,N-<br>Dimethyltetradecylamin<br>e-N-oxide | [M+H] <sup>+</sup> | C16H35<br>NO  | Organic nitrogen<br>compounds       | Organonitrogen<br>compounds                    |
| 65     | Choline                                     | [M+H] <sup>+</sup> | C5H13N<br>O   | Organic nitrogen<br>compounds       | Organonitrogen<br>compounds                    |
| 234    | 2"-Rhamnosylvitexin                         | [M+H] <sup>+</sup> | C27H30<br>O14 | Phenylpropanoids<br>and polyketides | Flavonoids                                     |
| 608    | 5-O-<br>methylvisammioside                  | [M+H] <sup>+</sup> | C22H28<br>O10 | Organoheterocyclic<br>compounds     | Benzopyrans                                    |
| 261    | Pterostilbene                               | [M+H] <sup>+</sup> | C16H16<br>O3  | Phenylpropanoids<br>and polyketides | Stilbenes                                      |
| 683    | Diethyl-phthalate                           | [M+H] <sup>+</sup> | C12H14        | Benzenoids                          | Benzene and                                    |

| PeakID | Title                                   | Adduct             | Formula    | Superclass                      | Class                                    |
|--------|-----------------------------------------|--------------------|------------|---------------------------------|------------------------------------------|
|        |                                         |                    | O4         |                                 | substituted derivatives                  |
| 829    | 13Z-Docosenamide                        | [M+H] <sup>+</sup> | C22H43NO   | Organic nitrogen compounds      | Organic nitrogen compounds               |
| 117    | Cyclo-prolylglycine                     | [M+H] <sup>+</sup> | C7H10N2O2  | Organic acids and derivatives   | Carboxylic acids and derivatives         |
| 580    | N,N-Dimethyldodecylamine                | [M+H] <sup>+</sup> | C14H31N    | Organic nitrogen compounds      | Organonitrogen compounds                 |
| 408    | Imidocarb                               | [M+H] <sup>+</sup> | C19H20N6O  | Benzenoids                      | Benzene and substituted derivatives      |
| 178    | PYROGLUTAMATE                           | [M+H] <sup>+</sup> | C5H7NO3    | Organic acids and derivatives   | Carboxylic acids and derivatives         |
| 645    | 1-Octadecylamine                        | [M+H] <sup>+</sup> | C18H39N    | Organic nitrogen compounds      | Organonitrogen compounds                 |
| 94     | Proline betaine                         | [M+H] <sup>+</sup> | C7H13NO2   | Organic acids and derivatives   | Carboxylic acids and derivatives         |
| 161    | 3-Acetylphenanthrene                    | [M+H] <sup>+</sup> | C16H12O    | Benzenoids                      | Phenanthrenes and derivatives            |
| 462    | (Z)-Guggulsterone                       | [M+H] <sup>+</sup> | C21H28O2   | Lipids and lipid-like molecules | Steroids and steroid derivatives         |
| 366    | 1-(3-(Trifluoromethyl)phenyl)piperazine | [M+H] <sup>+</sup> | C11H13F3N2 | Organoheterocyclic compounds    | Diazinanes                               |
| 675    | alpha-Cyperone                          | [M+H] <sup>+</sup> | C15H22O    | Lipids and lipid-like molecules | Prenol lipids                            |
| 646    | Triphenyl phosphate (TPP)               | [M+H] <sup>+</sup> | C18H15O4P  | Organic acids and derivatives   | Organic phosphoric acids and derivatives |
| 291    | Indoline                                | [M+H] <sup>+</sup> | C8H9N      | Organoheterocyclic compounds    | Indoles and derivatives                  |
| 256    | Piperidine                              | [M+H] <sup>+</sup> | C5H11N     | Organoheterocyclic compounds    | Piperidines                              |
| 904    | NKH477                                  | [M+H] <sup>+</sup> | C27H43NO8  | Lipids and lipid-like molecules | Prenol lipids                            |
| 697    | Corynoxine                              | [M+H] <sup>+</sup> | C22H26N2O4 | Organoheterocyclic compounds    | Indolizidines                            |
| 569    | Stearic acid                            | [M+H] <sup>+</sup> | C18H36O2   | Lipids and lipid-like molecules | Fatty Acyls                              |
| 263    | ANABASAMINE                             | [M+H] <sup>+</sup> | C16H19N3   | Mixed metal/non-metal compounds | Alkali metal salts                       |
| 453    | Cyclo(proline-leucine)                  | [M+H] <sup>+</sup> | C11H18N2O2 | Organic acids and derivatives   | Carboxylic acids and derivatives         |
| 185    | Guanine                                 | [M+H] <sup>+</sup> | C5H5N5O    | Organoheterocyclic compounds    | Imidazopyrimidines                       |
| 446    | Harmane                                 | [M+H] <sup>+</sup> | C12H10N2   | Alkaloids and derivatives       | Harmala alkaloids                        |

| PeakID | Title                                      | Adduct             | Formula                                                          | Superclass                                | Class                               |
|--------|--------------------------------------------|--------------------|------------------------------------------------------------------|-------------------------------------------|-------------------------------------|
| 557    | Brevicarine                                | [M+H] <sup>+</sup> | C <sub>17</sub> H <sub>21</sub> N <sub>3</sub>                   | Alkaloids and derivatives                 | Harmala alkaloids                   |
| 520    | 4-Hydroxycoumarin                          | [M+H] <sup>+</sup> | C <sub>9</sub> H <sub>6</sub> O <sub>3</sub>                     | Phenylpropanoids and polyketides          | Coumarins and derivatives           |
| 879    | Asarone                                    | [M+H] <sup>+</sup> | C <sub>12</sub> H <sub>16</sub> O <sub>3</sub>                   | Benzenoids                                | Phenol ethers                       |
| 191    | p-Coumaric acid                            | [M+H] <sup>+</sup> | C <sub>9</sub> H <sub>8</sub> O <sub>3</sub>                     | Phenylpropanoids and polyketides          | Cinnamic acids and derivatives      |
| 5      | benzylazanium                              | [M+H] <sup>+</sup> | C <sub>7</sub> H <sub>9</sub> N                                  | Benzenoids                                | Benzene and substituted derivatives |
| 7      | KOJIC ACID                                 | [M+H] <sup>+</sup> | C <sub>6</sub> H <sub>6</sub> O <sub>4</sub>                     | Benzenoids                                | Naphthalenes                        |
| 11     | 4-Methylpyrazole                           | [M+H] <sup>+</sup> | C <sub>4</sub> H <sub>6</sub> N <sub>2</sub>                     | Organoheterocyclic compounds              | Azoles                              |
| 14     | Piperazine                                 | [M+H] <sup>+</sup> | C <sub>4</sub> H <sub>10</sub> N <sub>2</sub>                    | Organoheterocyclic compounds              | Diazinanes                          |
| 15     | Hypotaaurine                               | [M+H] <sup>+</sup> | C <sub>2</sub> H <sub>7</sub> NO <sub>2</sub> S                  | Organic acids and derivatives             | Sulfinic acids and derivatives      |
| 18     | 4-amino-2-chloropyridine                   | [M+H] <sup>+</sup> | C <sub>5</sub> H <sub>5</sub> ClN <sub>2</sub>                   | Organoheterocyclic compounds              | Pyridines and derivatives           |
| 21     | Ectoine                                    | [M+H] <sup>+</sup> | C <sub>6</sub> H <sub>10</sub> N <sub>2</sub> O <sub>2</sub>     | Organic acids and derivatives             | Carboxylic acids and derivatives    |
| 22     | OROTATE                                    | [M+H] <sup>+</sup> | C <sub>5</sub> H <sub>4</sub> N <sub>2</sub> O <sub>4</sub>      | Organoheterocyclic compounds              | Diazines                            |
| 25     | Methiocarb-sulfoxide phenol                | [M+H] <sup>+</sup> | C <sub>9</sub> H <sub>12</sub> O <sub>2</sub> S                  | Benzenoids                                | Benzene and substituted derivatives |
| 26     | 1-Naphthoic acid methyl ester              | [M+H] <sup>+</sup> | C <sub>12</sub> H <sub>10</sub> O <sub>2</sub>                   | Benzenoids                                | Naphthalenes                        |
| 28     | Splitomicin                                | [M+H] <sup>+</sup> | C <sub>13</sub> H <sub>10</sub> O <sub>2</sub>                   | Organoheterocyclic compounds              | Naphthopyrans                       |
| 30     | ETANIDAZOLE                                | [M+H] <sup>+</sup> | C <sub>7</sub> H <sub>10</sub> N <sub>4</sub> O <sub>4</sub>     | Organic nitrogen compounds                | Organonitrogen compounds            |
| 31     | Anserine                                   | [M+H] <sup>+</sup> | C <sub>10</sub> H <sub>16</sub> N <sub>4</sub> O <sub>3</sub>    | Organic acids and derivatives             | Peptidomimetics                     |
| 67     | 4-Amino-5-hydroxymethyl-2-methylpyrimidine | [M+H] <sup>+</sup> | C <sub>6</sub> H <sub>9</sub> N <sub>3</sub> O                   | Organoheterocyclic compounds              | Diazines                            |
| 77     | Spectra matches to compound Tolaasin E     | [M+H] <sup>+</sup> | C <sub>92</sub> H <sub>159</sub> N <sub>21</sub> O <sub>24</sub> | Organic acids and derivatives             | Peptidomimetics                     |
| 88     | 1,3-DIMETHYLURACIL                         | [M+H] <sup>+</sup> | C <sub>6</sub> H <sub>8</sub> N <sub>2</sub> O <sub>2</sub>      | Organoheterocyclic compounds              | Diazines                            |
| 89     | Justicidin B                               | [M+H] <sup>+</sup> | C <sub>21</sub> H <sub>16</sub> O <sub>6</sub>                   | Lignans, neolignans and related compounds | Arylnaphthalene lignans             |
| 92     | Dimethyl sulfone                           | [M+H] <sup>+</sup> | C <sub>2</sub> H <sub>6</sub> O <sub>2</sub> S                   | Organosulfur compounds                    | Sulfonyls                           |

| PeakID | Title                                      | Adduct               | Formula            | Superclass                      | Class                               |
|--------|--------------------------------------------|----------------------|--------------------|---------------------------------|-------------------------------------|
| 93     | Ortophosphate                              | [M+H] <sup>+</sup>   | H3O4P              | Homogeneous non-metal compounds | Non-metal oxoanionic compounds      |
| 95     | ACECLIDINE                                 | [M+H] <sup>+</sup>   | C9H15N<br>O2       | Organoheterocyclic compounds    | Quinuclidines                       |
| 114    | N-Acetyl-L-Histidine                       | [M+H] <sup>+</sup>   | C8H11N<br>3O3      | Organic acids and derivatives   | Carboxylic acids and derivatives    |
| 121    | 1-Hexylamine                               | [M+H] <sup>+</sup>   | C6H15N             | Organic nitrogen compounds      | Organonitrogen compounds            |
| 122    | 2,4-Heptadienal                            | [M+H] <sup>+</sup>   | C7H10O             | Organic oxygen compounds        | Organooxygen compounds              |
| 124    | Histamine                                  | [M+H] <sup>+</sup>   | C5H9N3             | Organic nitrogen compounds      | Organonitrogen compounds            |
| 137    | Piperine                                   | [M+H] <sup>+</sup>   | C17H19<br>NO3      | Alkaloids and derivatives       |                                     |
| 139    | 1-Naphthonitrile                           | [M+H] <sup>+</sup>   | C11H7N             | Benzenoids                      | Naphthalenes                        |
| 140    | 1-Isothiocyanato-8-(methylsulfinyl)-octane | [M+H] <sup>+</sup>   | C10H19<br>NOS2     | Organosulfur compounds          | Sulfoxides                          |
| 144    | DMPO                                       | [M+H] <sup>+</sup>   | C6H11N<br>O        | Organoheterocyclic compounds    | Pyrrolines                          |
| 145    | Pyrazinamide                               | [M+NH4] <sup>+</sup> | C5H5N3<br>O        | Organoheterocyclic compounds    | Diazines                            |
| 147    | Trans-4-Hydroxy-L-proline                  | [M+H] <sup>+</sup>   | C5H9NO<br>3        | Organic acids and derivatives   | Carboxylic acids and derivatives    |
| 149    | Trigonelline                               | [M+H] <sup>+</sup>   | C7H7NO<br>2        | Alkaloids and derivatives       |                                     |
| 150    | Methionine                                 | [M+NH4] <sup>+</sup> | C5H11N<br>O2S      | Organic acids and derivatives   | Carboxylic acids and derivatives    |
| 151    | Xanthine                                   | [M+H] <sup>+</sup>   | C5H4N4<br>O2       | Organoheterocyclic compounds    | Imidazopyrimidines                  |
| 152    | 2,5-dihydroxy benzoic acid                 | [M+H] <sup>+</sup>   | C7H6O4             | Benzenoids                      | Benzene and substituted derivatives |
| 153    | Pyridoxamine                               | [M+H] <sup>+</sup>   | C8H12N<br>2O2      | Organoheterocyclic compounds    | Pyridines and derivatives           |
| 620    | Dodecylbenzenesulfonic acid                | 325.178              | [M-H] <sup>-</sup> | C18H30O3S                       | Benzenoids                          |
| 218    | (S)-MALATE                                 | 133.0117             | [M-H] <sup>-</sup> | C4H6O5                          | Organic acids and derivatives       |
| 633    | Canrenone                                  | 339.193              | [M-H] <sup>-</sup> | C22H28O3                        | Lipids and lipid-like molecules     |
| 614    | Tocotrienol                                | 423.3191             | [M-H] <sup>-</sup> | C29H44O2                        | Lipids and lipid-like molecules     |
| 103    | Pyrophosphate                              | 176.9323             | [M-H] <sup>-</sup> | H4O7P2                          | Homogeneous non-metal compounds     |
| 122    | BETA-GLYCEROPHOSPHAT                       | 170.9964             | [M-H] <sup>-</sup> | C3H9O6P                         | Lipids and lipid-like molecules     |

| PeakID | Title                             | Adduct   | Formula | Superclass   | Class                                   |
|--------|-----------------------------------|----------|---------|--------------|-----------------------------------------|
|        | E                                 |          |         |              |                                         |
| 246    | 3-Furoic acid                     | 111.0062 | [M-H]-  | C5H4O3       | Organoheterocyclic compounds            |
| 575    | 13-OxoODE                         | 293.2058 | [M-H]-  | C18H30O3     | Lipids and lipid-like molecules         |
| 352    | L-Phenylalanine                   | 164.0683 | [M-H]-  | C9H11NO2     | Organic acids and derivatives           |
| 234    | Itaconic acid                     | 129.0171 | [M-H]-  | C5H6O4       | Lipids and lipid-like molecules         |
| 465    | Fenbufen                          | 253.0888 | [M-H]-  | C16H14O3     | Organic oxygen compounds                |
| 508    | 5-HYDROXY DICLOFENAC              | 310.0029 | [M-H]-  | C14H11Cl2NO3 | Benzenoids                              |
| 599    | Tryptophenolide                   | 311.1624 | [M-H]-  | C20H24O3     | Lipids and lipid-like molecules         |
| 2      | Acrylate                          | 70.99739 | [M-H]-  | C3H4O2       | Organic acids and derivatives           |
| 4      | Oxalacetic acid                   | 130.9633 | [M-H]-  | C4H4O5       | Organic acids and derivatives           |
| 20     | Acetylenedicarboxylic acid        | 112.9832 | [M-H]-  | C4H2O4       | Organic acids and derivatives           |
| 88     | B-(4-Fluorobenzoyl)propionic acid | 195.0463 | [M-H]-  | C10H9FO3     | Organic oxygen compounds                |
| 102    | 4-Fluorocinnamic acid             | 165.0365 | [M-H]-  | C9H7FO2      | Phenylpropanoids and polyketides        |
| 118    | sulfite (Sodium sulfite)          | 80.96158 | [M-H]-  | H2O3S        | Homogeneous non-metal compounds         |
| 121    | Decanoate                         | 170.9947 | [M-H]-  | C10H20O2     | Lipids and lipid-like molecules         |
| 128    | (E)-C-HDMAPP                      | 259.015  | [M-H]-  | C6H14O7P2    | Organic acids and derivatives           |
| 165    | L-Thyroxine                       | 775.6833 | [M-H]-  | C15H11I4NO4  | Organic acids and derivatives           |
| 182    | 9-Fluorenone                      | 179.0518 | [M-H]-  | C13H8O       | Benzenoids                              |
| 183    | D-SACCHARIC ACID                  | 209.0254 | [M-H]-  | C6H10O8      | Organic oxygen compounds                |
| 184    | 2-Hydroxyanthraquinone            | 223.0406 | [M-H]-  | C14H8O3      | Benzenoids                              |
| 210    | Maleamic acid                     | 114.0171 | [M-H]-  | C4H5NO3      | Lipids and lipid-like molecules         |
| 211    | 3,4-DIHYDROXY-L-PHENYLALANINE     | 196.0687 | [M-H]-  | C9H11NO4     | Organic acids and derivatives           |
| 213    | URIDINE-5-MONOPHOSPHATE           | 323.0222 | [M-H]-  | C9H13N2O9P   | Nucleosides, nucleotides, and analogues |
| 217    | MALEIC ACID                       | 115.0013 | [M-H]-  | C4H4O4       | Organic acids and                       |

| PeakID | Title                                | Adduct   | Formula | Superclass   | Class                                   |
|--------|--------------------------------------|----------|---------|--------------|-----------------------------------------|
|        |                                      |          |         |              | derivatives                             |
| 219    | Fluroxypyr                           | 252.9663 | [M-H]-  | C7H5Cl2FN2O3 | Organoheterocyclic compounds            |
| 221    | 6-<br>PHOSPHOGLUCONIC<br>ACID        | 275.0162 | [M-H]-  | C6H13O10P    | Organic oxygen compounds                |
| 233    | 1,4-Butynediol                       | 85.02721 | [M-H]-  | C4H6O2       | Organic oxygen compounds                |
| 235    | Citramalate                          | 147.026  | [M-H]-  | C5H8O5       | Lipids and lipid-like molecules         |
| 237    | trans-Aconitate                      | 173.0059 | [M-H]-  | C6H6O6       | Organic acids and derivatives           |
| 238    | 1-Hydroxy-2-naphthoic acid           | 187.0383 | [M-H]-  | C11H8O3      | Benzenoids                              |
| 239    | N-1-Desalkylflurazepam               | 287.0381 | [M-H]-  | C15H10ClFN2O | Organoheterocyclic compounds            |
| 240    | Naptalam                             | 290.0822 | [M-H]-  | C18H13NO3    | Benzenoids                              |
| 242    | 3',5'-CYCLIC AMP                     | 328.037  | [M-H]-  | C10H12N5O6P  | Nucleosides, nucleotides, and analogues |
| 243    | AMP                                  | 346.0479 | [M-H]-  | C10H14N5O7P  | Nucleosides, nucleotides, and analogues |
| 248    | 5-OXO-D-PROLINE                      | 128.0327 | [M-H]-  | C5H7NO3      | Organic acids and derivatives           |
| 249    | N-Methyl-L-glutamate                 | 160.0583 | [M-H]-  | C6H11NO4     | Organic acids and derivatives           |
| 251    | CITRATE                              | 191.0158 | [M-H]-  | C6H8O7       | Organic acids and derivatives           |
| 253    | lipoamide                            | 204.0464 | [M-H]-  | C8H15NOS2    | Organoheterocyclic compounds            |
| 254    | Uridine                              | 243.0568 | [M-H]-  | C9H12N2O6    | Nucleosides, nucleotides, and analogues |
| 259    | Caffeoyl-N-tyrosine                  | 341.9016 | [M-H]-  | C18H17NO6    | Organic acids and derivatives           |
| 260    | GUANOSINE 5'-<br>MONOPHOSPHATE       | 362.0415 | [M-H]-  | C10H14N5O8P  | Nucleosides, nucleotides, and analogues |
| 264    | L-Tyrosine                           | 180.062  | [M-H]-  | C9H11NO3     | Organic acids and derivatives           |
| 265    | 3-Methyluridine                      | 257.0728 | [M-H]-  | C10H14N2O6   | Nucleosides, nucleotides, and analogues |
| 266    | Guanosine-3',5'-cyclic monophosphate | 344.0334 | [M-H]-  | C10H12N5O7P  | Nucleosides, nucleotides, and analogues |

| PeakID | Title                                        | Adduct   | Formula  | Superclass   | Class                            |
|--------|----------------------------------------------|----------|----------|--------------|----------------------------------|
| 278    | Carbonyl cyanide chlorophenylhydrazone       | 203.0151 | [M-H]-   | C9H5ClN4     | Benzenoids                       |
| 279    | Fluorescein                                  | 331.063  | [M-H]-   | C20H12O5     | Organoheterocyclic compounds     |
| 281    | Betadex                                      | 1133.341 | [M-2H]2- | C42H70O35    | Organic oxygen compounds         |
| 334    | Norleucine                                   | 130.0845 | [M-H]-   | C6H13NO2     | Organic acids and derivatives    |
| 335    | Phosphotyrosine                              | 260.0391 | [M-H]-   | C9H12NO6P    | Organic acids and derivatives    |
| 338    | alpha-guaiaconic acid                        | 339.123  | [M-H]-   | C20H20O5     | Organoheterocyclic compounds     |
| 339    | Placodiolic acid                             | 375.0983 | [M-H]-   | C19H20O8     | Benzenoids                       |
| 340    | Samidin                                      | 385.1271 | [M-H]-   | C21H22O7     | Phenylpropanoids and polyketides |
| 357    | Porphobilinogen                              | 225.0833 | [M-H]-   | C10H14N2O4   | Organic nitrogen compounds       |
| 358    | Ginnalin B                                   | 315.0674 | [M-H]-   | C13H16O9     | Benzenoids                       |
| 359    | Traumatic Acid                               | 227.1347 | [M-H]-   | C12H20O4     | Lipids and lipid-like molecules  |
| 360    | ADIPIC ACID                                  | 145.047  | [M-H]-   | C6H10O4      | Lipids and lipid-like molecules  |
| 361    | Resveratrol                                  | 227.0991 | [M-H]-   | C14H12O3     | Phenylpropanoids and polyketides |
| 362    | Isobavachin                                  | 323.1283 | [M-H]-   | C20H20O4     | Phenylpropanoids and polyketides |
| 363    | Climbazol                                    | 291.0936 | [M-H]-   | C15H17ClN2O2 | Benzenoids                       |
| 365    | Coumaroyl quinic acid                        | 337.0865 | [M-H]-   | C16H18O8     | Organic oxygen compounds         |
| 366    | 2-NBDG                                       | 341.0806 | [M-H]-   | C12H14N4O8   | Organoheterocyclic compounds     |
| 367    | PRIM-O-GLUCOSYLCIMIFUGIN                     | 467.1472 | [M-H]-   | C22H28O11    | Organoheterocyclic compounds     |
| 368    | p-Acetaminobenzaldehyde                      | 162.0529 | [M-H]-   | C9H9NO2      | Benzenoids                       |
| 369    | Coumaroyl Hexoside                           | 325.0864 | [M-H]-   | C15H18O8     | Phenylpropanoids and polyketides |
| 370    | Axitinib                                     | 385.1101 | [M-H]-   | C22H18N4OS   | Organosulfur compounds           |
| 371    | 2-Acrylamido-2-methyl-1-propanesulfonic acid | 206.041  | [M-H]-   | C7H13NO4S    | Organic acids and derivatives    |
| 373    | agnuside                                     | 465.1349 | [M-H]-   | C22H26O11    | Lipids and lipid-like molecules  |
| 374    | Mesaconic acid                               | 129.0518 | [M-H]-   | C5H6O4       | Lipids and lipid-like molecules  |



| PeakID | Title                                                      | Adduct   | Formula | Superclass   | Class                            |
|--------|------------------------------------------------------------|----------|---------|--------------|----------------------------------|
| 376    | Besonprodil                                                | 401.1374 | [M-H]-  | C21H23FN2O3S | Organoheterocyclic compounds     |
| 378    | Isosakuranin                                               | 447.1423 | [M-H]-  | C22H24O10    | Phenylpropanoids and polyketides |
| 379    | Pyroglutamyl-Isoleucine                                    | 241.1152 | [M-H]-  | C11H18N2O4   | Organic acids and derivatives    |
| 380    | Oxytetracycline                                            | 459.141  | [M-H]-  | C22H24N2O9   | Phenylpropanoids and polyketides |
| 381    | 7-Hydroxymethotrexat                                       | 469.166  | [M-H]-  | C20H22N8O6   | Organoheterocyclic compounds     |
| 382    | 4,4'-Sulfonylbis[2-(prop-2-en-1-yl)phenol]                 | 329.0857 | [M-H]-  | C18H18O4S    | Benzenoids                       |
| 383    | methyl asterrate                                           | 361.0892 | [M-H]-  | C18H18O8     | Benzenoids                       |
| 385    | Cetirizine                                                 | 387.1581 | [M-H]-  | C21H25ClN2O3 | Benzenoids                       |
| 386    | Oxycarboxin                                                | 266.0445 | [M-H]-  | C12H13NO4S   | Benzenoids                       |
| 388    | BENZOATE                                                   | 121.0271 | [M-H]-  | C7H6O2       | Benzenoids                       |
| 391    | RHODOMYRTOXIN                                              | 427.1726 | [M-H]-  | C24H28O7     | Organoheterocyclic compounds     |
| 392    | Galocatechin                                               | 305.064  | [M-H]-  | C15H14O7     | Phenylpropanoids and polyketides |
| 393    | Betamethasone 21                                           | 433.1994 | [M-H]-  | C24H31FO6    | Lipids and lipid-like molecules  |
| 394    | Jasmonic acid                                              | 209.1251 | [M-H]-  | C12H18O3     | Lipids and lipid-like molecules  |
| 395    | O-Acetylcarnitine                                          | 202.104  | [M-H]-  | C9H17NO4     | Lipids and lipid-like molecules  |
| 396    | Clobenpropit                                               | 307.0789 | [M-H]-  | C14H17ClN4S  | Benzenoids                       |
| 401    | 3-(5-methoxy-2,2-dimethylchromen-8-yl)-3-oxopropanoic acid | 275.0982 | [M-H]-  | C15H16O5     | Organoheterocyclic compounds     |
| 402    | Methyl Haematommate                                        | 209.0409 | [M-H]-  | C10H10O5     | Benzenoids                       |
| 405    | Flufenamic acid                                            | 280.0596 | [M-H]-  | C14H10F3NO2  | Benzenoids                       |
| 408    | 4-Vinylphenol                                              | 119.047  | [M-H]-  | C8H8O        | Benzenoids                       |
| 409    | 2-Hydroxycinnamic acid                                     | 163.0376 | [M-H]-  | C9H8O3       | Phenylpropanoids and polyketides |
| 410    | N-Acetyl-L-phenylalanine                                   | 206.0776 | [M-H]-  | C11H13NO3    | Organic acids and derivatives    |
| 412    | Tuckolide<br>Decarestrictine D                             | 215.0885 | [M-H]-  | C10H16O5     |                                  |
| 414    | Ethopabate                                                 | 236.088  | [M-H]-  | C12H15NO4    | Benzenoids                       |
| 416    | 1,4-Cyclohexanedicarboxylic acid                           | 171.063  | [M-H]-  | C8H12O4      | Organic acids and derivatives    |
| 417    | 3,7,3',4',5'-Pentahydroxyflavone                           | 301.0297 | [M-H]-  | C15H10O7     | Phenylpropanoids and polyketides |

| PeakID | Title                                | Adduct   | Formula | Superclass  | Class                                   |
|--------|--------------------------------------|----------|---------|-------------|-----------------------------------------|
| 418    | ferulic acid                         | 193.0474 | [M-H]-  | C10H10O4    | Phenylpropanoids and polyketides        |
| 420    | Methyl Jasmonic acid                 | 223.1411 | [M-H]-  | C13H20O3    | Lipids and lipid-like molecules         |
| 421    | coumarin-SAHA                        | 345.148  | [M-H]-  | C18H22N2O5  | Phenylpropanoids and polyketides        |
| 422    | Methotrexate                         | 453.17   | [M-H]-  | C20H22N8O5  | Organoheterocyclic compounds            |
| 423    | Closone butyrate                     | 477.1834 | [M-H]-  | C26H32ClFO5 |                                         |
| 424    | Maltotriose                          | 503.1671 | [M-H]-  | C18H32O16   | Organic oxygen compounds                |
| 425    | Azelaic acid                         | 187.0938 | [M-H]-  | C9H16O4     | Lipids and lipid-like molecules         |
| 426    | 1,3,7-Trimethyluric acid             | 209.0745 | [M-H]-  | C8H10N4O3   | Organoheterocyclic compounds            |
| 427    | 15-keto Fluprostenol isopropyl ester | 497.2127 | [M-H]-  | C26H33F3O6  |                                         |
| 429    | Etomidate                            | 243.1191 | [M-H]-  | C14H16N2O2  | Organoheterocyclic compounds            |
| 430    | Luteolin                             | 285.0345 | [M-H]-  | C15H10O6    | Phenylpropanoids and polyketides        |
| 432    | Carapin                              | 467.2048 | [M-H]-  | C27H32O7    | Lipids and lipid-like molecules         |
| 435    | FKGK 11                              | 279.0847 | [M-H]-  | C13H13F5O   | Benzenoids                              |
| 439    | 4-hydroxynonenoic acid               | 171.0993 | [M-H]-  | C9H16O3     |                                         |
| 446    | -Mevalonic acid 5-phosphate          | 227.0301 | [M-H]-  | C6H13O7P    |                                         |
| 449    | sinapaldehyde glucoside              | 369.1153 | [M-H]-  | C17H22O9    | Organic oxygen compounds                |
| 454    | Sebacic acid                         | 201.1083 | [M-H]-  | C10H18O4    | Lipids and lipid-like molecules         |
| 455    | Thiopental                           | 241.1034 | [M-H]-  | C11H18N2O2S | Organoheterocyclic compounds            |
| 457    | Illicic acid                         | 251.1705 | [M-H]-  | C15H24O3    | Lipids and lipid-like molecules         |
| 461    | (-)-12-hydroxyjasmonic acid          | 225.1084 | [M-H]-  | C12H18O4    | Lipids and lipid-like molecules         |
| 464    | 2',3'-Dideoxyinosine                 | 235.0789 | [M-H]-  | C10H12N4O3  | Nucleosides, nucleotides, and analogues |
| 468    | Catechin                             | 289.0636 | [M-H]-  | C15H14O6    | Phenylpropanoids and polyketides        |
| 469    | Farrerol                             | 299.0931 | [M-H]-  | C17H16O5    | Phenylpropanoids and polyketides        |
| 474    | syringin                             | 371.1308 | [M-H]-  | C17H24O9    | Organic oxygen compounds                |

| PeakID | Title                                                   | Adduct   | Formula | Superclass   | Class                                     |
|--------|---------------------------------------------------------|----------|---------|--------------|-------------------------------------------|
| 480    | Undecanedioic acid                                      | 215.1254 | [M-H]-  | C11H20O4     | Lipids and lipid-like molecules           |
| 481    | (10E,15Z)-9,12,13-trihydroxyoctadeca-10,15-dienoic acid | 327.2109 | [M-H]-  | C18H32O5     | Lipids and lipid-like molecules           |
| 482    | Tetranor-12(R)-HETE                                     | 265.1856 | [M-H]-  | C16H26O3     |                                           |
| 487    | Virensic acid                                           | 357.0548 | [M-H]-  | C18H14O8     | Phenylpropanoids and polyketides          |
| 489    | (Z)-5,8,11-trihydroxyoctadec-9-enoic acid               | 329.2272 | [M-H]-  | C18H34O5     | Lipids and lipid-like molecules           |
| 491    | gmelinol                                                | 401.0805 | [M-H]-  | C22H26O7     | Lignans, neolignans and related compounds |
| 492    | Oenin                                                   | 491.1118 | [M-H]-  | C23H24O12    | Phenylpropanoids and polyketides          |
| 498    | Glucoibarin                                             | 478.0913 | [M-H]-  | C15H29NO10S3 | Organic oxygen compounds                  |
| 507    | Picrotin                                                | 309.0881 | [M-H]-  | C15H18O7     | Organoheterocyclic compounds              |
| 518    | e-64                                                    | 356.0068 | [M-H]-  | C15H27N5O5   | Organoheterocyclic compounds              |
| 527    | Monoisobutyl phthalate                                  | 221.0781 | [M-H]-  | C12H14O4     | Benzenoids                                |
| 528    | ORTHOTHYBOTINIC ACID                                    | 193.0833 | [M-H]-  | C11H14O3     | Lipids and lipid-like molecules           |
| 529    | EPIAFZELECHIN TRIMETHYL ETHER                           | 315.117  | [M-H]-  | C18H20O5     | Phenylpropanoids and polyketides          |
| 530    | CEHC                                                    | 249.1084 | [M-H]-  | C14H18O4     |                                           |
| 531    | Methyl jasmonate                                        | 223.1291 | [M-H]-  | C13H20O3     | Lipids and lipid-like molecules           |
| 532    | 1,11-Undecanedicarboxylic acid                          | 243.1553 | [M-H]-  | C13H24O4     | Lipids and lipid-like molecules           |
| 537    | 7-(2-aminophenyl)heptanoic acid                         | 220.1425 | [M-H]-  | C13H19NO2    |                                           |
| 538    | 3-(8-hydroxyoctyl)phenol                                | 221.1502 | [M-H]-  | C14H22O2     | Lipids and lipid-like molecules           |
| 539    | N-acetyl-O-methyltyrosine                               | 236.1012 | [M-H]-  | C12H15NO4    | Organic acids and derivatives             |
| 540    | [6]-Gingerol                                            | 293.1702 | [M-H]-  | C17H26O4     | Benzenoids                                |
| 542    | Thyrotropin releasing hormone                           | 361.1555 | [M-H]-  | C16H22N6O4   | Organic acids and derivatives             |
| 543    | AN-7                                                    | 449.1421 | [M-H]-  | C19H34N2O2S4 |                                           |
| 545    | C12-AE1S (TENTATIVE)                                    | 309.1652 | [M-H]-  | C14H30O5S    | Organic acids and derivatives             |

| PeakID | Title                                              | Adduct   | Formula | Superclass   | Class                            |
|--------|----------------------------------------------------|----------|---------|--------------|----------------------------------|
| 546    | 13S-HpOTrE(gamma)                                  | 309.2007 | [M-H]-  | C18H30O4     |                                  |
| 547    | Chrysanthemic Acid, Ethyl Ester                    | 195.1352 | [M-H]-  | C12H20O2     | Lipids and lipid-like molecules  |
| 548    | Anserine                                           | 239.1243 | [M-H]-  | C10H16N4O3   | Organic acids and derivatives    |
| 553    | Prostaglandin D2-d9                                | 360.2696 | [M-H]-  | C20H23D9O5   | Lipids and lipid-like molecules  |
| 558    | N-Methyltyrosine                                   | 194.0782 | [M-H]-  | C10H13NO3    | Organic acids and derivatives    |
| 559    | (9Z,12E)-15,16-dihydroxyoctadeca-9,12-dienoic acid | 311.2168 | [M-H]-  | C18H32O4     | Lipids and lipid-like molecules  |
| 562    | 12-OPDA                                            | 291.1901 | [M-H]-  | C18H28O3     | Lipids and lipid-like molecules  |
| 566    | Lacosamide                                         | 249.1302 | [M-H]-  | C13H18N2O3   | Organic acids and derivatives    |
| 567    | PLATYPHYLLENONE                                    | 295.135  | [M-H]-  | C19H20O3     | Phenylpropanoids and polyketides |
| 570    | 9,10-DiHOME                                        | 313.2316 | [M-H]-  | C18H34O4     |                                  |
| 574    | Curcumenol                                         | 233.1492 | [M-H]-  | C15H22O2     | Lipids and lipid-like molecules  |
| 576    | Ricinoleic acid                                    | 297.2362 | [M-H]-  | C18H34O3     | Lipids and lipid-like molecules  |
| 578    | 9-hydroxy-10,12-octadecadienoic acid               | 295.2224 | [M-H]-  | C18H32O3     | Lipids and lipid-like molecules  |
| 579    | 2,6-Di-tert-butyl-4-nitrophenol                    | 250.14   | [M-H]-  | C14H21NO3    | Benzenoids                       |
| 580    | OSELTAMIVIR PHOSPHATE                              | 311.1945 | [M-H]-  | C16H28N2O4   | Organic acids and derivatives    |
| 581    | Lauryl sulfate                                     | 265.1429 | [M-H]-  | C12H26O4S    | Organic acids and derivatives    |
| 582    | 3,5-Dicarbethoxy-1,4-dihydrocollidine              | 266.1466 | [M-H]-  | C14H21NO4    |                                  |
| 583    | Iso-Olomoucine                                     | 297.1474 | [M-H]-  | C15H18N6O    | Organoheterocyclic compounds     |
| 586    | hirsutanone                                        | 327.1202 | [M-H]-  | C19H20O5     | Phenylpropanoids and polyketides |
| 593    | Pseudoyohimbine                                    | 353.1948 | [M-H]-  | C21H26N2O3   | Alkaloids and derivatives        |
| 596    | Misoprostol                                        | 367.2574 | [M-H]-  | C21H36O5     | Lipids and lipid-like molecules  |
| 597    | [12]-Gingerol                                      | 377.265  | [M-H]-  | C23H38O4     |                                  |
| 598    | HYCANTHONE                                         | 355.1517 | [M-H]-  | C20H24N2O2S  | Organoheterocyclic compounds     |
| 658    | Chlorpyrifos-methyl                                | 319.8836 | [M-H]-  | C7H7Cl3NO3PS | Organic acids and derivatives    |
